# Supplementary material for: Calponin 3 Regulates Actin Cytoskeleton Rearrangement in Trophoblastic Cell Fusion
Source: PubMed Central journal article supplement — Mol Biol Cell. 2010 Nov 15;21(22):3973–84. doi: 10.1091/mbc.E10-03-0261 (PMC2982094; doi:10.1091/mbc.e10-03-0261), 2010-11-15

## 1 SUPPLEMENTS

### 3 Experimental procedures

#### 5 *RT-PCR analysis*

6 Total RNA was prepared from HEK293 and BeWo cells using the TRIzol reagent (Invitrogen),  
7 and the cDNA were synthesized by Superscriptase II (Invitrogen) with an oligo (dT) primer.  
8 To determine the expression of each CNN isoform, PCR was performed with specific primers  
9 (5'-3'): gcgaagacgaaaggaaac and gcggaattgtagtagttg for CNN1, ggcgggggtggacattgg and  
10 ggtagtaaggggatatt for CNN2, ccaaagtgaattggctg and atgccttggtcgtatat for CNN3,  
11 catttcaggggggagcc and gatgacctgcccacagc for GAPDH. The reaction condition was as  
12 follows; 30 cycles of denaturation at 94°C for 30 sec, annealing at 58°C for 30 sec, and  
13 extension at 72°C for 30 sec. Amplified cDNA fragment were confirmed by electrophoresis on  
14 an 1% agarose gel.

#### 16 *Expression and purification of His-CNN3 fusion protein*

17 rCNN3 was produced by the *E. coli* BL21 which was transformed with pET19b containing a  
18 human CNN3 coding region. After induction by IPTG and incubation for 3h, recombinant  
19 His-tagged CNN3 were purified by nickel affinity chromatography according to the  
20 manufacture's protocol (Bio-Rad).

#### 22 *In vitro CNN3 phosphorylation assay*

23 rCNN3 (10 µg) was phosphorylated *in vitro* with either 100 ng ROCKII active (Millipore) or 50  
24 ng casein kinase1 active (Millipore) in an assay solution (50 µl) containing 50 mM Tris-HCl pH  
25 7.5, 2 mM EGTA, 1 mM EDTA, 5 mM MgCl<sub>2</sub>, 1 mM DTT, 6 mM KCl, 10 mM MnCl<sub>2</sub> and 100  
26 µM ATP. Reaction was terminated by addition of SDS-PAGE sample buffer. Phosphorylated  
27 rCNN3 was visualized by either ProQ Diamond phospho-specific staining or Western blotting  
28 using antibodies raised against phosphorylated S293 of CNN3.

#### 30 *In-gel digestion and peptide mass fingerprinting*

31 The gel pieces were washed twice in 300 µl of CH<sub>3</sub>CN for 30 min and dried. The gel pieces  
32 were then rehydrated in 100 µl of reduction buffer (10 mM DTT and 100 mM NH<sub>4</sub>HCO<sub>3</sub>) and  
33 left standing at 56°C for 1 h. After removal of supernatant, the gel pieces were incubated in  
34 100 µl of 50 mM iodoacetamide in 100 mM NH<sub>4</sub>HCO<sub>3</sub> at room temperature for 45 min. The  
35 gel pieces were then washed in 100 µl of 100 mM NH<sub>4</sub>HCO<sub>3</sub> and dehydrated in 300 µl of  
36 CH<sub>3</sub>CN. After washing and dehydration, the dried gel pieces were rehydrated on ice in

1 digestion buffer containing 50 mM Tris-HCl pH 8.0, 10 ng/μl each of lysylendopeptidase  
2 (WAKO, Osaka, Japan) and modified trypsin (Promega) for 45 min. The supernatant was  
3 replaced with 10 μl of 50 mM Tris-HCl, pH 8.0, and the gel pieces were incubated at 37°C  
4 overnight. The supernatant was collected and the digested peptides were extracted repeatedly  
5 with a 50 μl solution of 5% (v/v) formic acid and 50% (v/v) CH<sub>3</sub>CN by vortexing. The  
6 combined supernatant was evaporated to dryness in a vacuum centrifuge. Resulting peptides  
7 were absorbed onto a ZipTip C18 (Millipore), and bound peptides were eluted with 50%  
8 CH<sub>3</sub>CN and 0.1% trifluoroacetic acid (TFA). Equal amounts of the resulting peptide solution  
9 and a sample matrix (saturated α-cyano-4-hydroxycinnamic acid dissolved in 50% CH<sub>3</sub>CN and  
10 0.1% TFA) for matrix-assisted laser desorption/ionization (MALDI) were mixed on the sample  
11 target for mass spectrometry (MS). Peptide mass fingerprinting was carried out with Mascot  
12 search for the peptide masses obtained by a Voyager DE-Pro time-of-flight mass spectrometer  
13 (Applied Biosystems).

#### 14 15 ***Phospho-peptide enrichment and MS***

16 Purified FlagCNN3 was reduced with DTT followed by carbamidomethylation, and the  
17 alkylated samples were digested with a mixture of trypsin and lysylendopeptidase in a buffer  
18 containing 0.1 M Tris HCl (pH 8.0) at 37°C overnight. Phosphopeptides from the digests were  
19 enriched using a MonoTip TiO (Larsen *et al.*, 2005; Liang *et al.*, 2006; Thingholm *et al.*, 2006;  
20 Sugiyama *et al.*, 2007) (GL Science, Tokyo, Japan) according to the manufacturer's protocol.  
21 Dephosphorylation reactions were performed in 50 mM NH<sub>4</sub>HCO<sub>3</sub> containing 0.1% alkaline  
22 phosphatase at 37°C for 15 min. Alternatively, to collect the phosphopeptides, HPLC of the  
23 digests was carried out on a C18 column (150 × 1.0 mm) with a linear gradient elution of  
24 CH<sub>3</sub>CN (1–70%, v/v) in 0.1% (v/v) TFA. The phosphopeptides isolated by HPLC or MonoTip  
25 TiO were subjected to MS or further digested with endoproteinase AspN (Roche Diagnostics,  
26 Basel, Switzerland) in a buffer containing 50mM Tris-HCl at pH 7.4, and then dried for MS.  
27 The measurements for phosphopeptides were carried out in linear TOF mode. Tandem mass  
28 spectrometry (MS/MS) was performed on a MALDI multiple-stage tandem mass spectrometer  
29 AXIMA-QIT (Shimadzu, Kyoto, Japan).

#### 30 31 32 **Legends of supplemental figures**

33 **Figure S1 Verification of lentivirus-mediated CNN3 gene knockdown in BeWo cells, and**  
34 **cellular localization of CNN3 in HEK293 cells. (A)** Identification of endogenous CNN  
35 isoforms in HEK293 and BeWo cells by RT-PCR. mRNA expression of endogenous CNN  
36 isoforms was examined by RT-PCR. Total RNA was isolated from HEK293 and BeWo cells

1 and reverse transcriptase reactions were performed. The cDNA were amplified by PCR as  
2 describes in the supplemental experimental procedure section. **(B)** Western blotting of CNN3  
3 to verify the knockdown in GFP-expressing ("G" in the panel) or CFP-Nuc-expressing ("C" in  
4 the panel) BeWo cells. Transgenes were introduced into BeWo cells using a lentivirus with  
5 both U6-dependent shRNA and CMV-dependent marker gene expression. Two independent  
6 shRNA sequences for RNAi were used. **(C)** Cell lysate of BeWo cells after forskolin treatment  
7 at indicated times was analyzed by Western blotting using indicated antibodies. The amount of  
8 loaded samples was adjusted according to the GAPDH levels in each sample. **(D)** Flag-CNN3  
9 was transduced using a lentivirus and the HEK293 cells were treated with 50  $\mu$ M forskolin for  
10 the indicated times. Flag-CNN3 was recovered by immunoprecipitation using anti-FLAG  
11 agarose and co-IP assay was carried out using the indicated antibodies. **(E)** EYFP-CNN3  
12 distribution was not changed by forskolin treatment in HEK293 cells alone. Scale bar: 50  $\mu$ m.  
13 **(F)** Wild type (WT) or  $\Delta$ C Flag-CNN3 expressing HEK293 cells were treated with forskolin for  
14 the indicated times and CNN3-actin association was analyzed by co-IP assay using anti-Flag  
15 agarose. **(G)** *In vitro*-phosphorylation assay was performed using rCNN3 as substrate.  
16 rCNN3 phosphorylation was induced by addition of either active form of ROCKII or casein  
17 kinase1 for indicated times. Phosphorylated rCNN3 was detected by ProQ Diamond  
18 phospho-specific staining (upper panels) or Western blotting using indicated antibodies (lower  
19 panels). **(H)** The CAPMP fraction extracted from BeWo cells was separated by 2-DE and  
20 transferred onto PVDF membranes for immunoblotting analysis. The spots indicated by  
21 arrowheads were those at the same isoelectric point.

22

23 **Figure S2 Analysis of phosphopeptides derived from Flag-CNN3.** **(A)** MALDI linear TOF  
24 mass spectrum of a tryptic digest from FlagCNN3 expressed in HEK293 cells. FlagCNN3 was  
25 purified using anti Flag-agarose and concentrated by TCA precipitation. After alkylation,  
26 samples were digested with a mixture of trypsin and lysylendopeptidase. **(B)** MALDI linear  
27 TOF mass spectra of phosphopeptides enriched by TiO<sub>2</sub>, before (a and c) and after (b and d)  
28 alkaline phosphatase (AP) treatment. Trypsinised samples from (A) were further purified  
29 using TiO<sub>2</sub>. Verification of phosphopeptide was analyzed by dephosphorylation assay using  
30 alkaline phosphatase. **(C)** MALDI linear TOF mass spectrum of an HPLC fraction  
31 containing phospho-peptides. **(D)** MALDI QIT TOF mass spectrum of an HPLC fraction  
32 containing phosphopeptides. **(E)** Product ion mass spectra of the protonated peptides at  
33  $m/z$ 2437,  $m/z$ 3228 and  $m/z$ 3930. **(F, G)** MALDI linear TOF mass spectra of an HPLC fraction  
34 containing phosphopeptides from additional endoproteinase AspN digestion, before (upper  
35 panel) and after (lower panel) AP treatment, and assignment of peptides. Note that the  
36 protonated peptide at  $m/z$ 2750.9 contains two phosphorylation sites as shown in **(G)**. Average

1 or exact mass is used for the linear TOF or QIT mass spectrum, respectively. (H) Putative  
2 phosphorylation sites based on mass spectrometric results from F. (I, J) MALDI linear TOF  
3 mass spectra of tryptic digests of various CNN3 mutants expressed in HEK293 cells, with or  
4 without AP treatment.

5  
6 **Figure S3 Characterization of phospho-specific CNN3 antibodies.** (A-D) ELISA of  
7 phospho-S293 (A, C) and phospho-S296 (B, D) antibodies. Phosphorylated (A, B) and  
8 non-phosphorylated (C, D) peptides were covalently couples to N-oxysuccinimide plate and  
9 probed with various dilutions of normal rabbit serum (■), antibodies which were  
10 affinity-purified using phospho-peptide-conjugated sepharose and pre-absorbed with (▲) or  
11 absorbed (●) with non -phospho peptide-conjugated sepharose and an non-phospho  
12 peptide-adsorbed fraction (x). Note that phospho-S293 antibody has no reactivity with  
13 non-phospho peptide but that of phospho-S296 antibody remained weakly. (E) FlagCNN3s  
14 were transiently transfected to HEK293 cells by calcium phosphate. Equal amount of TCL  
15 samples were subjected to SDS-PAGE and analysed by western blotting using indicated  
16 antibodies. The antibody against phospho-S293 works well, but that against phospho-S296  
17 has residual affinity to non-phosphorylated CNN3 peptide as shown in D▲) and displays  
18 non-specific binding to the overexpressed CNN3. (F) BeWo TCL samples were prepared with  
19 or without forskolin treatment for indicated times and analyzed by western blotting using  
20 indicated antibodies. Since the specificity of the antibody raised against phospho-S296 was  
21 poor, this antibody was applied to the cytosolic fraction in Figure 6A.

22  
23 **Figure S4 Distribution of the YFP-tagged CNN3 mutants in BeWo cells.**  
24 EYFP-CNN3-expressing cells were cultivated in the presence (B) or absence (A) of 50  $\mu$ M  
25 forskolin for 72 h. After fixation, the cells were stained by Alexa Fluor 568-conjugated  
26 phalloidin (red) and DAPI (blue). Note that the syncytium expressing WT and S293,296D  
27 EYFP-CNN3 did not have F-actin bundles after forskolin treatment, whereas  $\Delta$ C and  
28 S293,296A EYFP-CNN3 still overlapped with F-actin even after forskolin treatment. The  
29 dotted lines show the periphery of syncytium. Scale bar: 50  $\mu$ m.

1 **Supplemental Table I**

2 List of proteins, from CAPMP fraction, accompanying a qualitative or quantitative change by  
3 fusion induction.

---

4 Expression (decrease after fusion induction)

- 5 • chaperonin containing TCP1, subunit 3
- 6 • chaperonin containing TCP1, subunit 7

7 Expression (increase after fusion induction)

- 8 • calreticulin precursor variant

9 Change isoelectric point

- 10 • laminin receptor 1
- 11 • protein phosphatase 1, catalytic subunit, alpha
- 12 • protein phosphatase 1, catalytic subunit, beta

13 Dephosphorylation

- 14 • adenylyl cyclase-associated protein
  - 15 • GAPDH/uracil DNA glycosylase
  - 16 • eukaryotic translation elongation factor 2
  - 17 • septin 2
  - 18 • calponin 3
- 

19

20

1 **Supplemental Table II**

2 Tryptic peptides of CNN3 identified by peptide mass fingerprinting

3

| <b>Start-End</b> | <b>Sequence</b>                        |
|------------------|----------------------------------------|
| 7 - 17           | K.GPSYGLSAEVK.N                        |
| 54 - 64          | K.DGILCELINK.L                         |
| 133 - 143        | K.GFHTTIDIGVK.Y                        |
| 159 - 172        | K.AGQSVIGLQMGTNK.C Oxidation (M)       |
| 193 - 212        | K.MQTDKPFDQTTISLQMGTNK.G Oxidation (M) |
| 193 - 212        | K.MQTDKPFD Oxidation (M)               |
| 257 - 265        | K.GMSVYGLGR.Q Oxidation (M)            |

4

5

6

---

1 **Supplemental reference**

2

3 Larsen, M.R., Thingholm, T.E., Jensen, O.N., Roepstorff, P., and Jorgensen, T.J. (2005). Highly  
4 selective enrichment of phosphorylated peptides from peptide mixtures using titanium dioxide  
5 microcolumns. *Mol Cell Proteomics*. 4, 873-886. Epub 2005 Apr 2027.

6 Liang, S.S., Makamba, H., Huang, S.Y., and Chen, S.H. (2006). Nano-titanium dioxide  
7 composites for the enrichment of phosphopeptides. *J Chromatogr A*. 1116, 38-45. Epub 2006  
8 Mar 2030.

9 Sugiyama, N., Masuda, T., Shinoda, K., Nakamura, A., Tomita, M., and Ishihama, Y. (2007).  
10 Phosphopeptide enrichment by aliphatic hydroxy acid-modified metal oxide chromatography  
11 for nano-LC-MS/MS in proteomics applications. *Mol Cell Proteomics* 6, 1103-1109.

12 Thingholm, T.E., Jorgensen, T.J., Jensen, O.N., and Larsen, M.R. (2006). Highly selective  
13 enrichment of phosphorylated peptides using titanium dioxide. *Nat Protoc*. 1, 1929-1935.

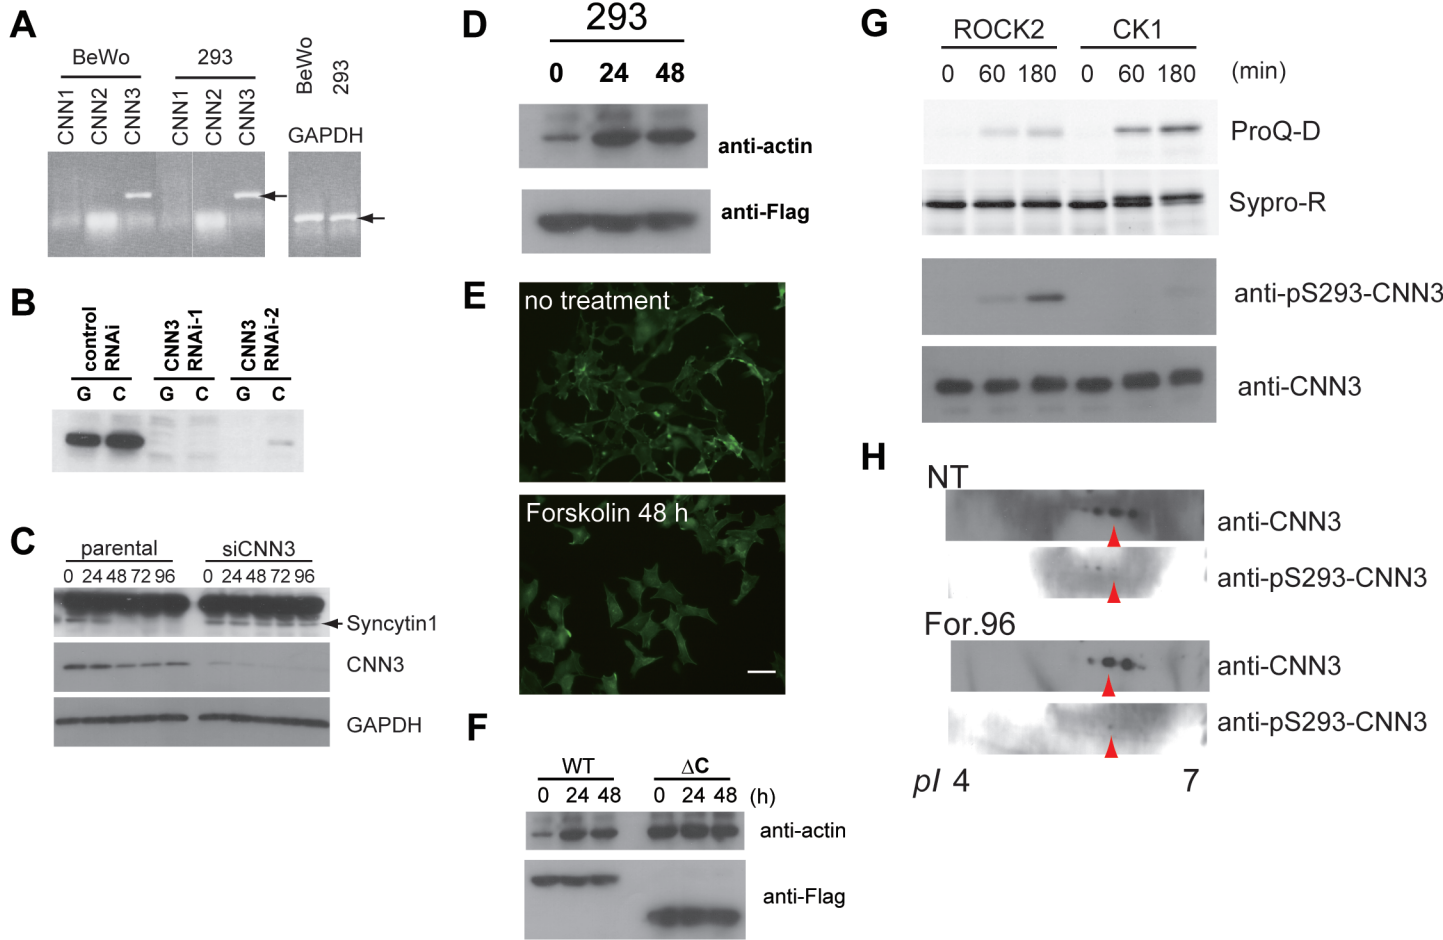



# Supplemental Figure S2

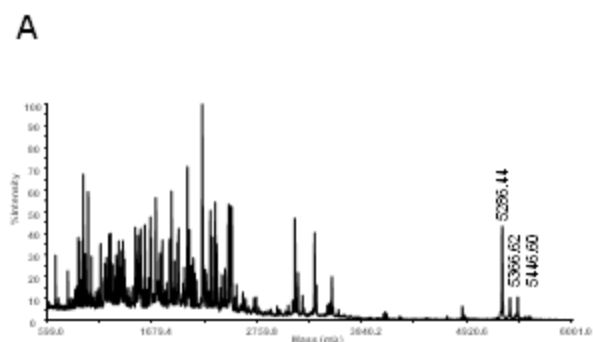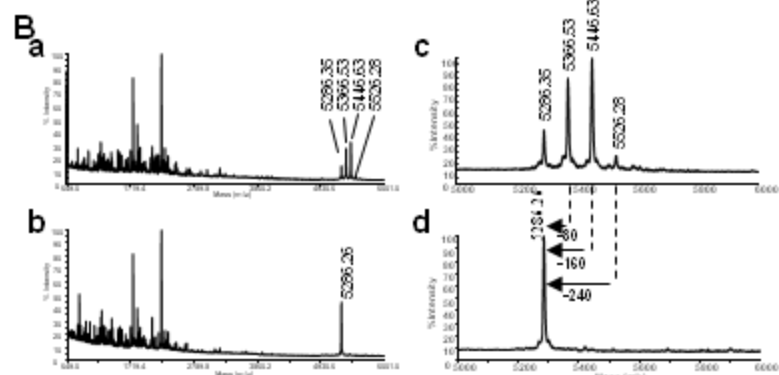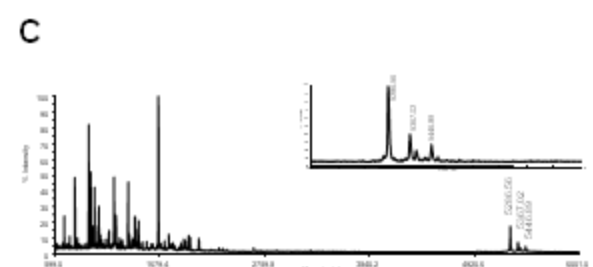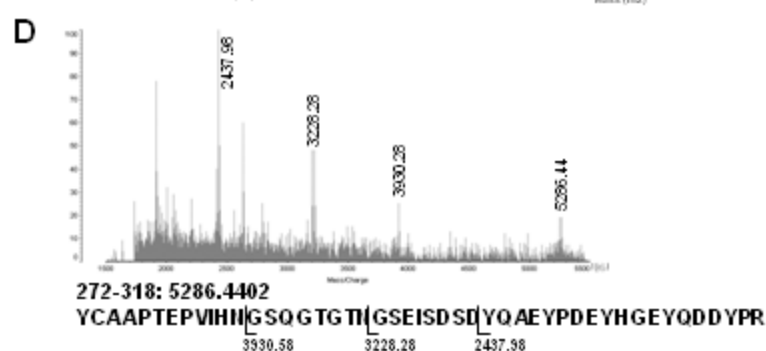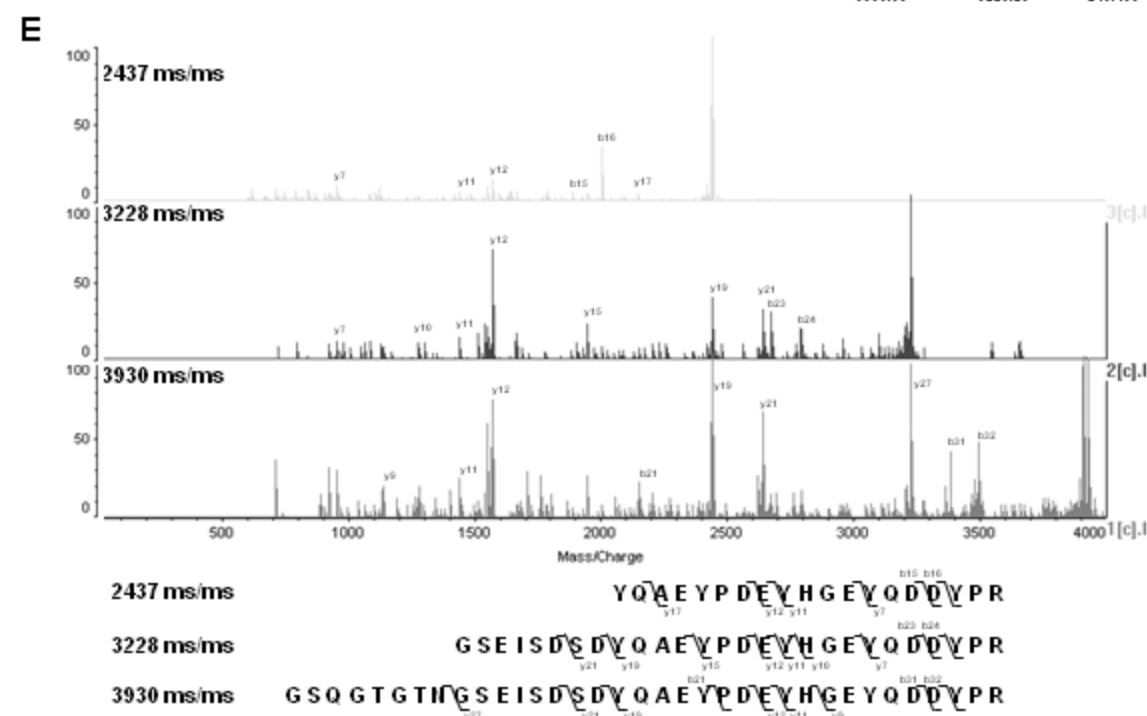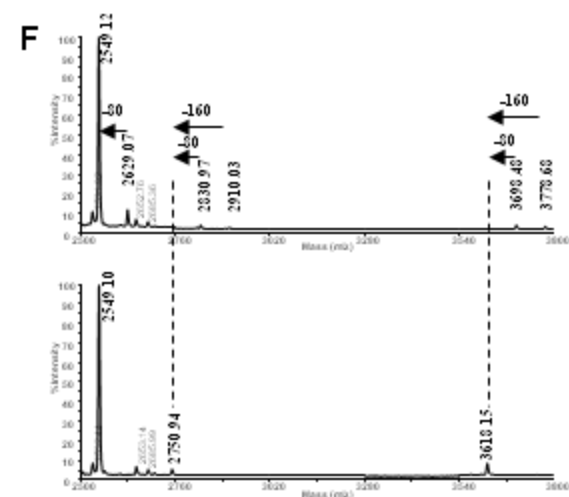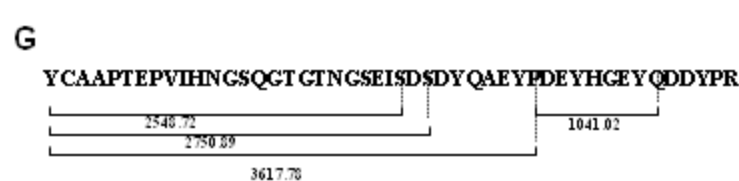

Supplemental Figure S2 (cont.)

H YCAAPTEPVIHNGSQGTGTNGSEISDSDYQAEYPDEYHGEYQDDYPR

I

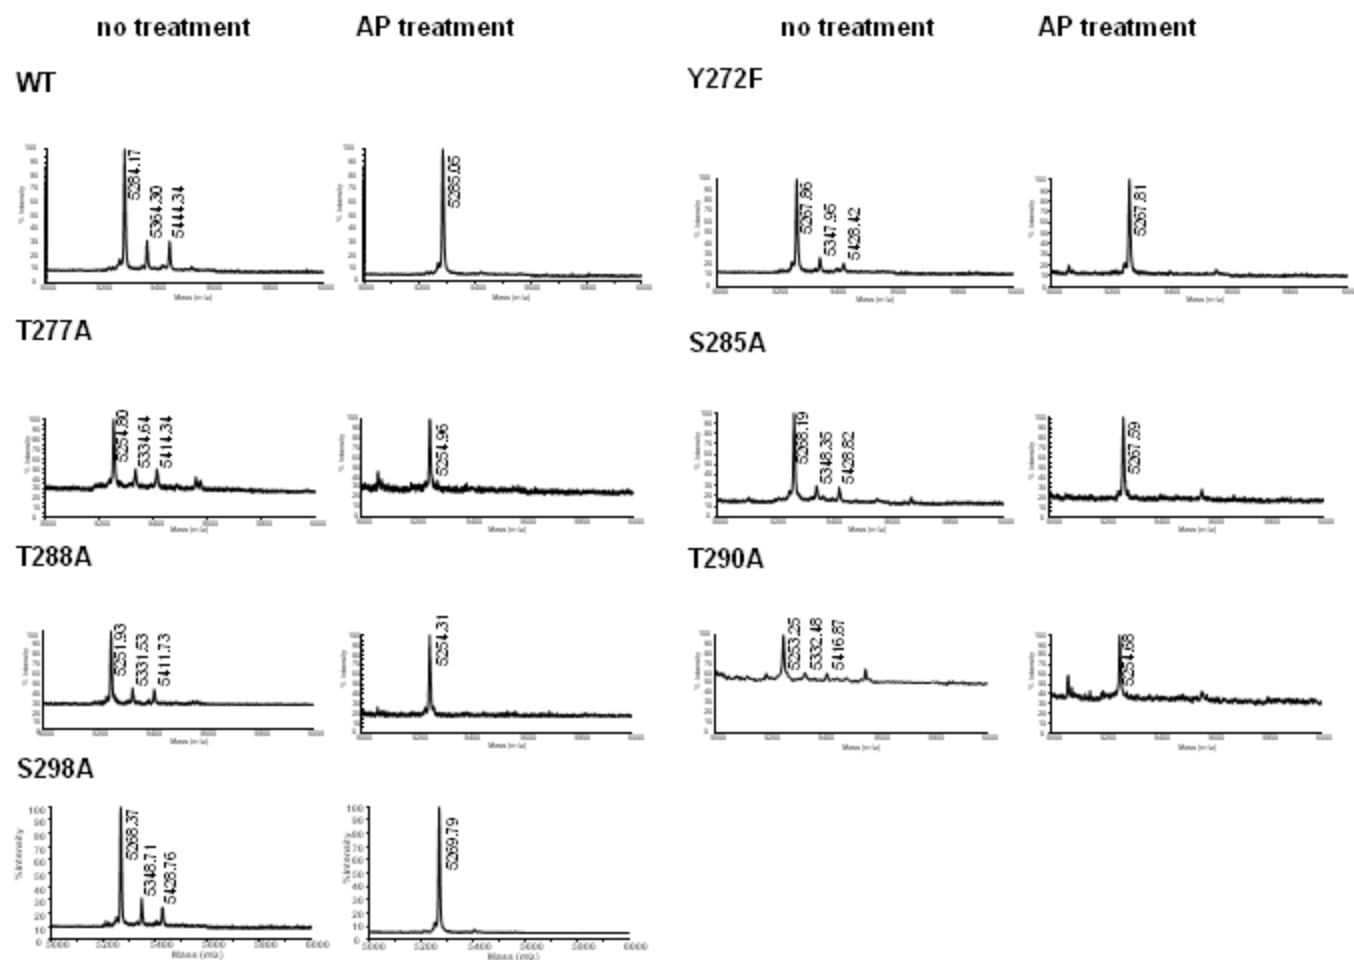

J

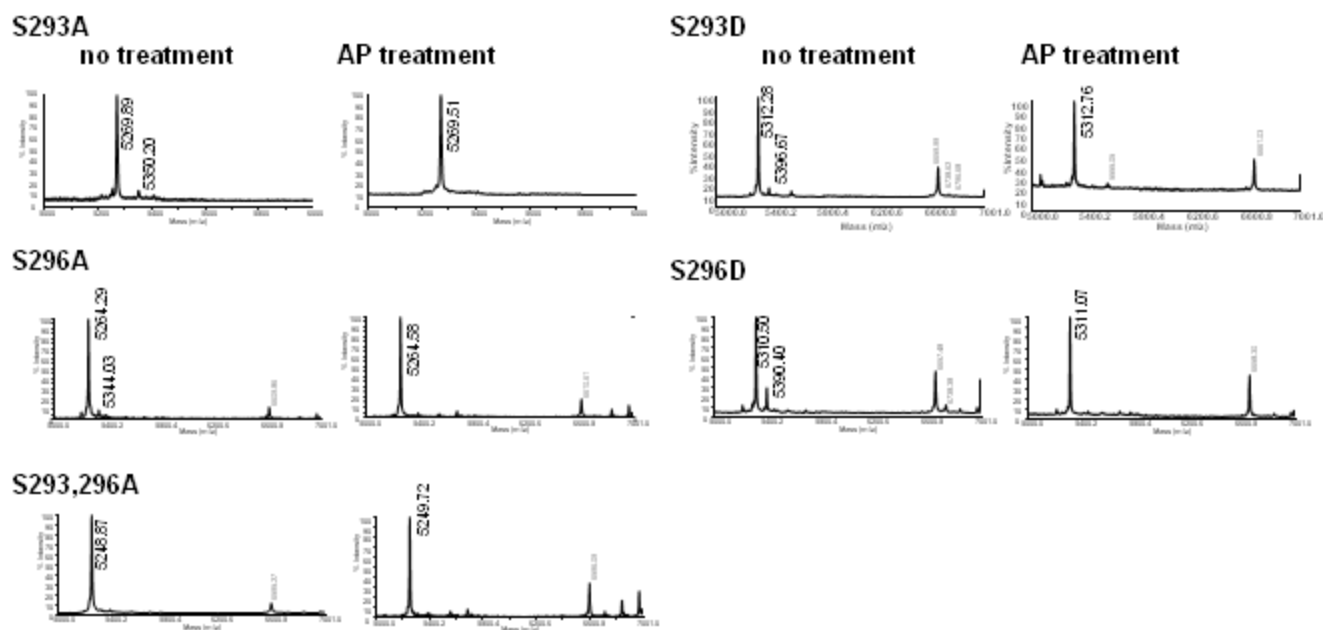

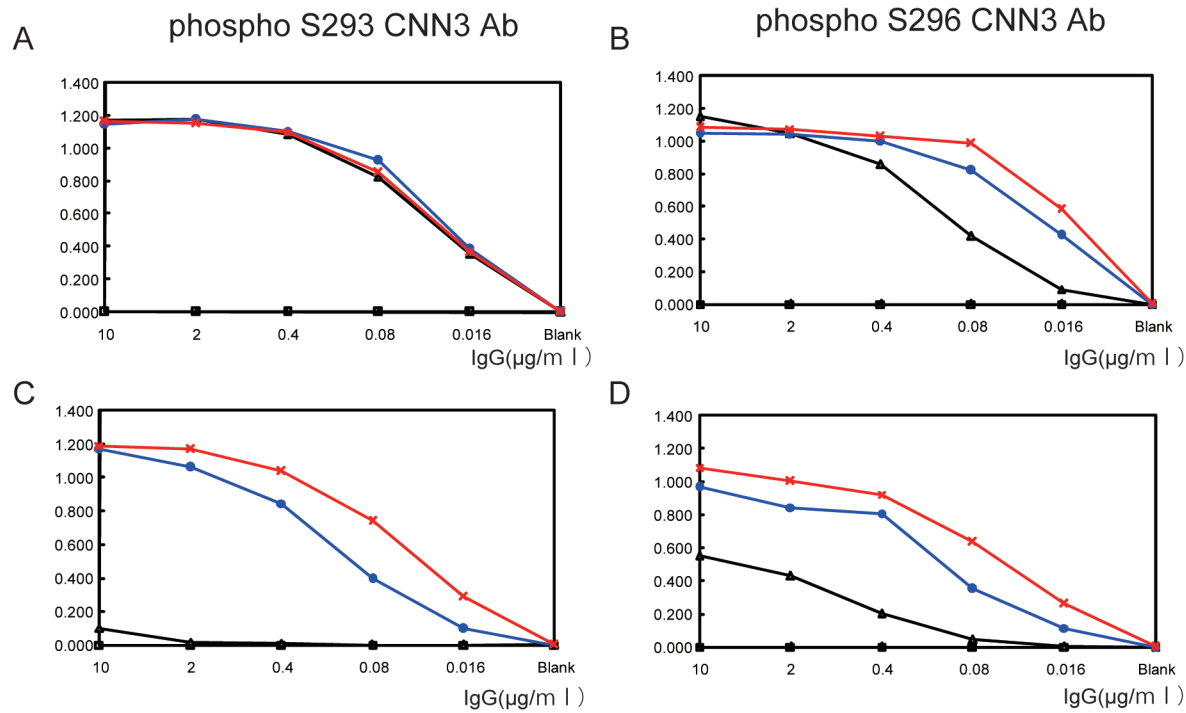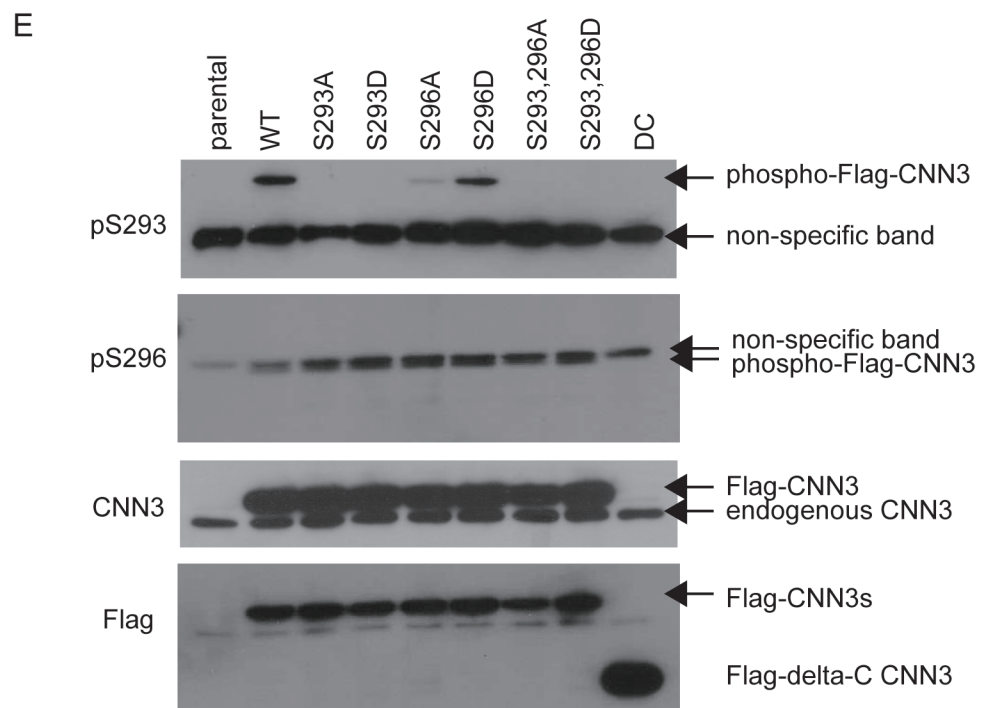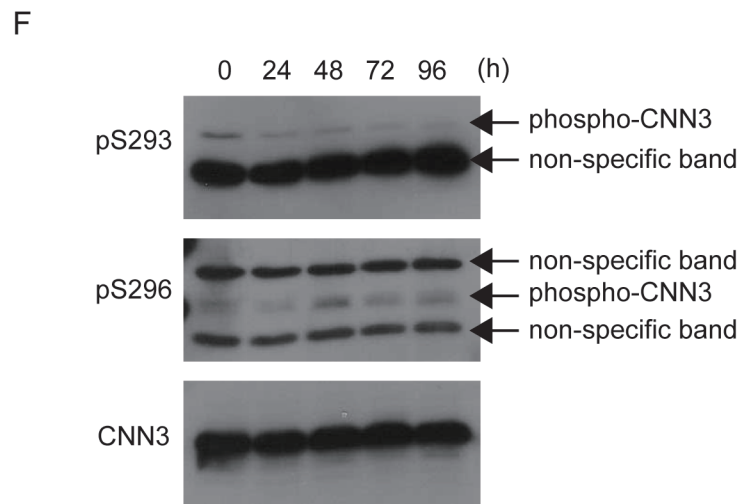

**A** no treatment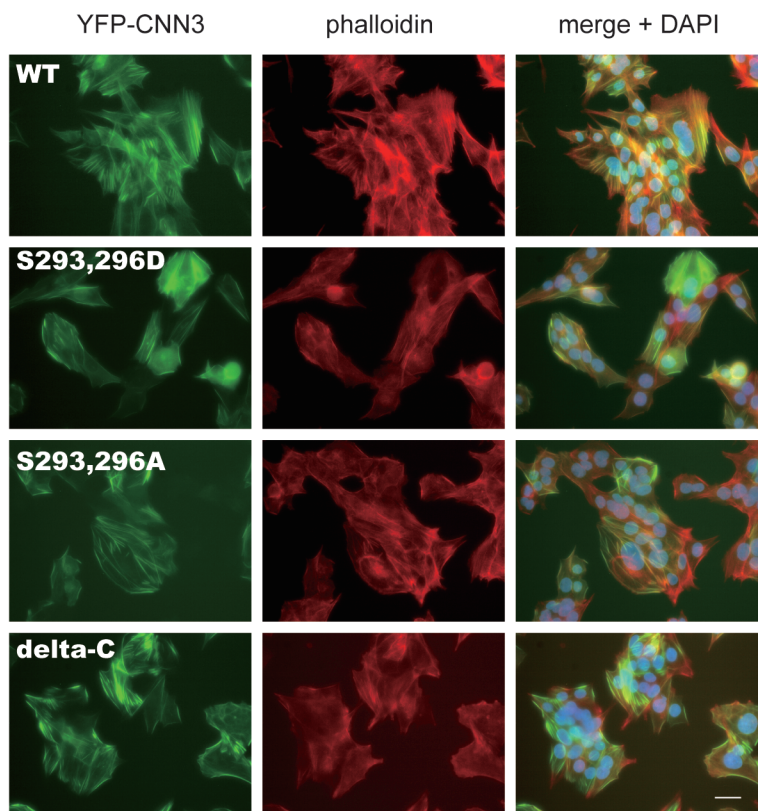**B** For. 72h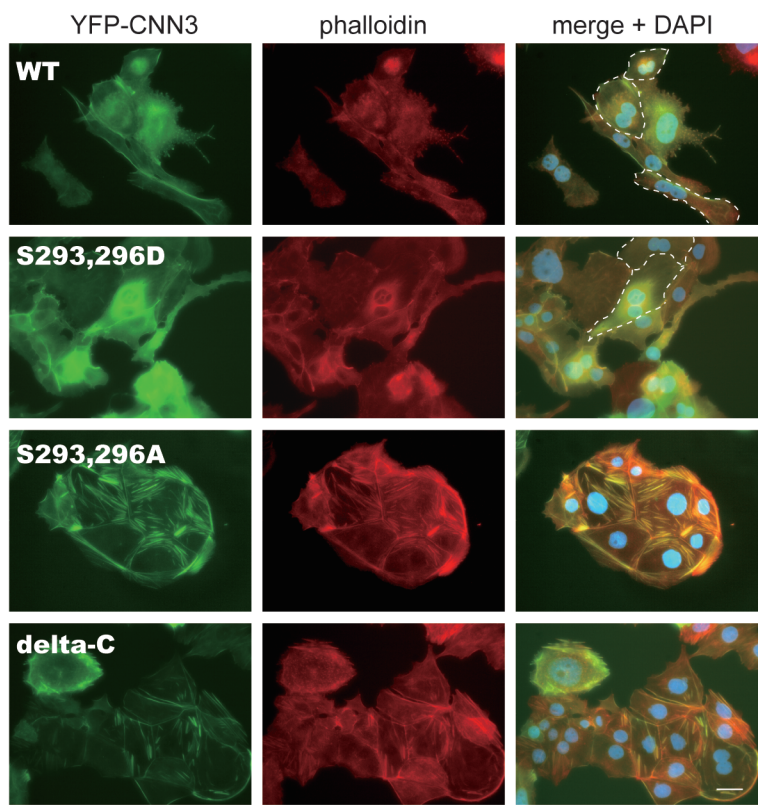

Supplement: E10-03-0261_1.pdf [file E10-03-0261_1.pdf]
